# Supplementary material
Source: PubMed Central journal article supplement (PMC3475195)
Supplement: supp_WNL.0b013e3181a6b2f8_hardin1.pdf [file supp_WNL.0b013e3181a6b2f8_hardin1.pdf]

# Uygulama Parametreleri güncellemesi: Epilepsili kadınlara yaklaşım konusu—Gebelik üzerine odaklanma (bir kanıta dayalı derleme): Obstetrik komplikasyonlar ve nöbet sıklığında değişme

Amerikan Nöroloji Akademisi ve Amerikan Epilepsi Derneği'nin Kalite Standartları Alt Komitesi ve Tedavi ve Teknoloji Değerlendirme Alt Komitesi'nin Raporu

C.L. Harden, MD  
J. Hopp, MD  
T.Y. Ting, MD  
P.B. Pennell, MD  
J.A. French, MD  
W.A. Hauser, MD  
S. Wiebe, MD  
G.S. Gronseth, MD  
D. Thurman, MD, MPH  
K.J. Meador, MD  
B.S. Koppel, MD  
P.W. Kaplan, MB, FRCP  
J.N. Robinson, MD  
B. Gidal, PharmD  
C.A. Hovinga, PharmD  
A.N. Wilner, MD  
B. Vazquez, MD  
L. Holmes, MD  
A. Krumholz, MD  
R. Finnell, PhD  
C. Le Guen

Yazışma adresi ve reprint istekleri için American Academy of Neurology, 1080 Montreal Avenue, St. Paul, MN 55116  
guidelines@aan.com

Ek veriler için  
www.neurology.org

Bakınız sayfa 314 ve 323

## ÖZET

**Amaç:** Epilepsili kadınların (EK) gebelikte bakımıyla ilgili, diğer kadınlara kıyasla gebelik komplikasyon veya diğer tıbbi problem gelişme riski, nöbet frekansında değişim, status epilepticus riski ve gebelik süresince nöbetsiz kalma oranı dahil, yönetim sorunlarının kanıtlarını tekrar değerlendirmek.

**Yöntemler:** Genel nörolog, epileptolog ve eczacılardan oluşan 20 üyeli bir komite, 1985 ve Şubat 2008 tarihleri arasında yapılandırılmış literatür derlemeleri ve ilgili makalelerin sınıflamasından elde edilen kanıtları değerlendirdi.

**Bulgular:** Antiepileptik ilaç alan EK için, sezaryen doğum veya geç gebelik kanaması riskinde ciddi derecede (beklenenden 2 kattan fazla yüksek) ve erken kontraksiyon veya erken travay ve doğum riskinde de (beklenenden 1.5 kattan fazla yüksek) orta derecede artmış risk saptanmamıştır. Sigara içen EK'de gebelik esnasında erken kontraksiyon ve erken travay riski muhtemelen ciddi derecede artar. Gebelik öncesindeki en az 9 ay boyunca nöbet geçirilmemesi, gebelik esnasında nöbet geçirmeme olasılığının (%84–92) muhtemelen yüksek olmasını sağlayabilir.

**Öneriler:** Epilepsili kadınlara (EK), gebelik öncesindeki en az 9 ay boyunca nöbet geçirmemeleri halinde yüksek bir olasılıkla gebelik esnasında da nöbet geçirmeyecekleri (%84–92) (Düzye B) söylenmelidir. Ancak, sigara içen EK'ye de sigaranın gebelik esnasında erken kontraksiyon, erken travay ve doğum riskini muhtemelen ciddi derecede arttırdığı mesajı verilmelidir (Düzye C). *Neurology*® 2009;73:126–132

## SÖZLÜK

AAN = American Academy of Neurology; CI = güven aralığı; OR = olasılık oranı; RR = göreceli risk; EK = epilepsili kadınlar.

Son ABD popülasyon tahminleri<sup>1</sup> ve epilepsi prevalansı,<sup>2</sup> yaklaşık yarım milyon epilepsili kadının (EK) çocuk doğurma yaşında olduğunu göstermektedir. Aynı zamanda, her 1000 doğum yapan kadından 3–5'inin EK olduğu da tahmin edilmektedir.<sup>3</sup> Epilepsi, kendiliğinden nüks eden nöbetlerle ve tedavide tipik olarak günlük, uzun dönemli antiepileptik ilaç (AEİ) rejimi kullanılmasıyla tanımlanır. Epilepsili kişilerin büyük kısmında nöbetler kontrollü ve kişi sağlıklıdır ve dolayısı ile çocuk doğurma dahil, her türlü normal yaşam faaliyetini gerçekleştirilmeleri beklenir.

Bu parametre ve diğer iki parametre, 1998 uygulama parametrelerinin güncelleştirilmiş halidir.<sup>4</sup> Gebe veya gebelik planlayan EK'nin klinik yönetimi hakkında bilgi sağlayan çok sayıda yeni çalışmayı analiz etmek amaçlı uygulama parametrelerinin geliştirilmesi için ileri metodoloji kullanılmıştır.

Bu parametrede 2 genel klinik soruya dair kanıtlar özetlenmiştir:

1. Epilepsili olmayan kadınlara kıyasla, EK'de a) Sezaryen doğum; b) preeklampsi; c) gebeliğe bağlı hipertansiyon; d) erken kontraksi-

27 Nisan 2009'da [www.neurology.org](http://www.neurology.org) adresinde elektronik olarak yayımlanmıştır.

Eş zamanlı olarak *Epilepsia* dergisinde de yayınlanmıştır.

Yazarların bağlı oldukları kuruluşlar makalenin sonunda listelenmiştir.

The Mission Statements of Quality Standards Subcommittee (QSS) and Therapeutics and Technology Assessment (TTA) Subcommittee, Conflict of Interest Statement, QSS members, TTA members, AAN classification of evidence, Classification of Recommendations (ek e-1–e-5) yanında tablo e-1–e-4, *Neurology*® Web sitesi [www.neurology.org](http://www.neurology.org)'da ek veriler sunulmuştur.

Quality Standards Subcommittee tarafından 5 Kasım 2008'de; Therapeutics and Technology Assessment Subcommittee tarafından 15 Kasım 2008'de; Practice Committee tarafından 18 Aralık 2008'de ve AAN Board of Directors tarafından 25 Mart 2009'da onaylanmıştır.

The Milken Family Foundation tarafından desteklenmiştir.

*Beyan:* Yazarların beyanları makalenin sonunda verilmiştir.

yonlar veya erken travay ve doğum; e) kanama komplikasyonları ve f) spontan düşük dahil, gebelikle ilişkili komplikasyon riski artmış mıdır?

2. Gebe kalan EK'de, a) nöbet frekansında değişim; b) status epileptikus riski ve c) eğer EK gebelikten önceki son 9 ayda nöbetsizse, nüks nöbet riski dahil, gebelik esnasında epilepsiyle ilgili komplikasyon riski nedir?

**ANALİTİK SÜRECİN TANIMI** Panel formasyonu. Amerikan Nöroloji Akademisi (AAN) tarafından genel nörologlar, epileptologlar ve AEİ deneyimine sahip eczacılardan oluşan bir uzman paneli oluşturuldu. Panele obstetrik uzmanı ve obstetrik ve teratolojide uzman hemşireler de dahil edildi. Bu çaba Milken Family Foundation'dan alınan grantla da desteklendi.

**Literatür derlemesi ve makale seçimi.** 1985 ve Aralık 2005 tarihleri arasında yayınlanan ilgili makaleler için MEDLINE, MEDLINE-In-Process, Current Contents, Biologic Abstracts ve BIOSIS previews'de bir literatür taraması yaptık. Aralık 2005 ve Haziran 2007 arasında araştırma güncellendi, Şubat 2008'de de bazı başlıklar için manüel araştırma yapıldı. Rastgele bir sınır tarih olarak 1985 tarihi seçildi, çünkü bu nispeten yeni makalelerin mevcut uygulamayı ve AEİ kullanım paternlerini daha iyi yansıttığı ve dolayısı ile bu değerlendirme için erken yayınlara göre daha uygulanabilir ve güvenilir olduğu düşünül-mektedir. Kullanılan araştırma terimleri nöbet/epilepsi, katamenyal epilepsi, gebelik, antikonvülzanlar, anti-epileptik ilaçlar, teratogenez, doğum defektleri, gebelik kaydı, bilişsel sonuç, vitamin K, folat/folik asit, emzirme, oral kontraseptifler, polikistik over sendromu, hormon replasman tedavisi, menapoz, perimenapoz ve fertilitiydi. Araştırma insan vakalarının kullanıldığı makalelerle sınırlıydı ve özetin İngilizce olduğu tüm lisanlar dahil edildi. Eksik referanslar ve derleme makalelerin ve primer araştırmada meta-analizlerin bibliyografilerini gözden geçirerek ikincil bir araştırma da yaptık.

Literatür araştırmasıyla toplam 876 özet saptandı. İlgili makaleleri bulmak için, 2 panel üyesi her bir özeti taradı. İki panel üyesinden biri makalenin potansiyel olarak ilgili olduğuna karar veriyse, özetin tam makalesi elde edildi. Genelde, özetlerin epilepsiye bağlı nöbetlerden ziyade eklampsiyle, teratogenez veya plasental AEİ metabolizması gibi temel mekanizmalarla ilgili olduğu veya panelin hazırladığı sorularla

ilgili olmadığı kanaati oluştuysa, bu özetler ile ri analizden çıkarıldı.

Derlemesi yapılacak 285 özet seçildi. Dört panel üyesi makaleleri tam haliyle okudu ve her bir klinik soruyla ilgili olanları saptadı. Makalelerin bu derlemenin analizine dahil edilmesi için bir gebe EK kohortunda gebelikle veya epilepsiyle ilgili komplikasyon frekansını saptamaları gerekiyordu. Klinik sorularıyla ilgili eş makaleler de uygun bir makaleye dahil edildi.

**Çalışma sınıflaması ve etki ölçümleri.** Nöbetsiz EK'de nüks nöbetlerle ilgili olan soru hariç, makaleler AAN kanıt şeması prognostik sınıflamasına göre sınıflandı (*Neurology*® Web sitesi www.neurology.org'da ek e-4A). Nöbetsiz EK'de nüks nöbetlerle ilgili makaleler AAN kanıt şema tarama sınıflamasına göre sınıflandı (ek e-4B). Bu şemanın seçilme nedeni, bu soruyla klinik olarak en ilgili olanın göreceli nöbet nüks riskinden ziyade mutlak risk olmasıydı. Makaleler 4 panel üyesince ayrı ayrı sınıflandı. Makalelerin kategorizasyonundaki uyumsuzluk tartışma ve konsensüsle çözüldü.

Gebelikle ilişkili komplikasyonlar için, gebe EK'deki komplikasyon sıklığıyla epilepsili olmayan gebe kadınlardaki sıklığı karşılaştırmayan çalışmalar düşük kanıt sınıfıyla değerlendirildi. Epilepsiyle ilgili komplikasyonlar için, gebe ve gebe olmayan EK'deki komplikasyon sıklığını mukayese etmeyen çalışmalar düşük kanıt sınıfıyla değerlendirildi.

Aynı zamanda, maskeli sonuç değerlendirmesi olmayan veya göreceli risk (RR) veya olasılık oranlarını (OR) belirlemek üzere yeterince bilgi sağlamayan çalışmaların derecesi düşürüldü. Sezaryen doğum, preeklampsi, gebeliğe bağlı hipertansiyon, spontan düşük ve status epileptikus gibi aşikar objektif sonuçlar maskeli sonuç değerlendirmesinden muaf tutuldu. Çalışmaların heterojenitesinden dolayı meta-analiz yapılamadı.

Mümkünse, epilepsi ve gebelikle ilişkili komplikasyonlar veya gebelik ve epilepsiyle ilişkili komplikasyonlar arasındaki ilişkiler OR ile saptandı. Makalede bildirilmeyen OR'lerin hesabı yazım paneli tarafından yapıldı. Sadece Sınıf I makalelerde<sup>5</sup> bildirilen verilerin ayrıntısını elde etmek için, yazarlarla kişisel olarak temas kuruldu. 2 × 2 tablonun hücrelerinden biri 0 olduğunda, OR'nin hesaplanması için her bir hücreye 0.5 eklendi.<sup>6</sup>

Bu parametrenin amacına yönelik olarak, orta derecede artmış risk OR 1.5–2 ve ciddi derecede artmış risk 2 veya üzerinde OR ile tanımlandı.

OR'lerin %95 güven aralığı (CI), kesinlik ölçümü için kullanıldı. Negatif çalışmaların, %95 CI'nın üst sınırına dayalı yüksek riski ekarte etmeye yeteceğine karar verildi. Bu bağlamda, OR 1.2 ile birlikte %95 CI 0.6–1.7'lik önemli ölçüde artmış komplikasyon riskine sahip olmayan çalışmanın orta derecede artmış komplikasyon riskini dışlamaya yetecek derecede hassas olmadığına karar verildi.

Uygulama tavsiyelerinin gücü ek e-5'de bulunan şema kullanılarak kanıt sınıfıyla doğrudan ilişkilendirildi.

**KANIT ANALİZİ** EK'nin gebelikle ilişkili komplikasyon riski yüksek midir? EK'de gebelikle ilişkili komplikasyonlar için dahil etme ölçütlerini karşılayan 25 makale vardı. Bazı makaleler 1'den fazla soruya cevap verebilmekteydi. Bu 25 makaleden 9'u Sınıf III veya üstü olarak derecelendi (tablo e-1).

**Sezaryen doğum.** Bir Sınıf I çalışmaya<sup>5</sup> göre AEİ alan EK'de sezaryen doğum riski epilepsisi olmayan kadınlardan çok daha yüksek değildir (OR 1.04, %95 CI 0.71–1.52). Bir Sınıf II çalışmaya<sup>7</sup> göre de AEİ alan EK'de sezaryen doğum riski epilepsisi olmayan kadınlardan çok daha yüksek değildir (OR 1.24, %95 CI 0.99–1.55). Ancak, her iki çalışma da orta derecede artmış riski dışlamaya yetecek kadar hassas değildir.

Üç Sınıf III çalışma (OR 17.88, %95 CI 4.73–67.58;<sup>8</sup> OR 1.58, %95 CI 1.10–2.25<sup>9</sup> ve OR 2.2, %95 CI 1.42–3.41<sup>10</sup>) önemli ölçüde artmış riski belgelemiştir.

Bazı çalışmalarda yüksek yanlılık riski ve istatistiksel belirsizlik hariç, Sınıf III çalışmalarda gözlenen Sınıf I ve II çalışmalara kıyasla artmış sezaryen doğum oranını açıklayacak yeterince bilgi yoktur.

**Sonuç.** Bir Sınıf I ve bir Sınıf II çalışmadan elde edilen kanıtlar temelinde, AEİ alan EK'nin sezaryen doğum riski muhtemelen ciddi derecede yüksek olmadığı söylenebilir. Sınıf I ve Sınıf II çalışmaların istatistiksel kesinliği olmaması ve çok sayıda Sınıf III çalışmadan elde edilen kanıtlar nedeniyle, sezaryen doğumda riskin orta derecede yüksek olması mümkündür.

**Preeklampsi.** Bir Sınıf I çalışmaya göre<sup>5</sup> AEİ alan EK'de preeklampsi riski epilepsisi olmayan kadınlardan çok daha yüksek değildir (OR 1.4, %95 CI 0.66–3.15). Ancak, bu çalışma artmış riski dışlayacak kadar hassas da değildir.

İki Sınıf II çalışmaya göre AEİ alan EK'de preeklampsi riski epilepsisi olmayan kadınlardan çok daha yüksek değildir (RR = 0.8, %95 CI 0.2–2.9<sup>11</sup> ve OR 1.24, %95 CI 0.77–1.99<sup>7</sup>).

Bu çalışmalar artmış riski dışlayacak kadar hassas da değildir.

**Sonuç.** AEİ alan EK'de yüksek preeklampsi riskini destekleyecek veya reddedecek yeterli kanıt yoktur.

**Gebeliğe bağlı hipertansiyon.** Bir Sınıf II çalışmaya göre AEİ alan EK'de gebeliğe bağlı hipertansiyon riski, epilepsisi olmayan kadınlardan çok daha yüksek değildir (OR 1.4, %95 CI 1.1–1.9).<sup>7</sup> Diğer bir Sınıf II çalışmaya (OR 0.7, %95 CI 0.3–1.6)<sup>11</sup> göre risk önemli ölçüde yüksek değildir, ancak artmış riski dışlayacak kadar hassas da değildir.

İki Sınıf III çalışmaya (OR 7.8, %95 CI 0.8–76.9<sup>8</sup> ve OR 1.2, %95 CI 0.7–2.1<sup>10</sup>) göre de risk önemli ölçüde yüksek değildir. Bu çalışmalar ciddi derecede artmış riski dışlayacak kadar hassas da değildir.

**Sonuç.** İki ihtilafli Sınıf II çalışmaya dayalı olarak, EK'de gebeliğe bağlı hipertansiyon riskini destekleyecek veya reddedecek yeterli kanıt yoktur.

**Erken kontraksiyonlar, erken travay ve doğum.** Bir Sınıf I çalışmaya<sup>5</sup> göre AEİ alan EK'de erken kontraksiyon veya erken travay ve doğum riski epilepsisi olmayan kadınlardan çok daha yüksek değildir (OR 0.51, %95 CI 0.19–1.36).

Bir Sınıf II çalışmaya<sup>12</sup> göre aynı zamanda sigara içen kontrol kadınlara kıyasla sigara içen EK'de risk daha yüksektir (OR 3.4, %95 CI 1.8–6.5) (veri kontrollere kıyasla tüm EK için geçerli değildir). Bir Sınıf III çalışmaya göre<sup>13</sup> de risk daha yüksektir ( $p < 0.05$ ). Diğer bir Sınıf III çalışma<sup>8</sup> ise önemli ölçüde artmış bir riski ortaya koyamamıştır, ancak ciddi derecede artmış riski dışlayacak kadar hassas da değildir (OR 8.24, %95 CI 0.92–70.32). Bir Sınıf III çalışmaya<sup>11</sup> göre risk önemli ölçüde yüksek değildir, ancak ciddi derecede artmış riski dışlayacak kadar hassas da değildir (RR 0.7, %95 CI 0.3–1.4). Bir kategorik,  $\chi^2$  istatistiğinde, erken doğum oranlarının kontrollerden farklı olmadığı bildirilmiş ( $p = 0.3$ )<sup>9</sup> ve diğer bir çalışmada da kontrollere kıyasla EK'nin çocuklarında gestasyonel yaş farkı belirlenmemiştir (EK = 38.06, SD 1.42 vs kontrol = 38.17, SD 3.58 hafta).<sup>10</sup>

**Sonuçlar.** Bir Sınıf I çalışmanın kanıtları temelinde, AEİ alan EK'nin gebelik esnasında erken kontraksiyon ve erken travay ve doğum riskinin orta derecede artması mümkün değildir. Ancak, bir Sınıf II çalışmadan elde edilen kanıtlar, sigara içen EK'de gebelik esnasında erken kontraksiyon ve erken travay ve doğum riskinin sigara içen epilepsisi olmayan kadınlardan ciddi derecede daha yüksek olabileceğini düşündürmektedir.

**Gebelikle ilişkili kanama komplikasyonları.** Bir Sınıf I çalışmaya<sup>5</sup> göre AEİ alan EK'de geç gebelik kanama riski epilepsisi olmayan kadınlardan çok daha yüksek değildir (OR 1.18, %95 CI 0.70–1.97). Bir Sınıf III çalışma<sup>11</sup> da riskin yüksek olmadığını göstermiştir (RR 0.9, %95 CI 0.4–2.0). Ancak, iki çalışma da ciddi derecede artmış riski dışlayacak kadar hassas değildir.

**Sonuç.** Bir Sınıf I ve bir Sınıf III çalışmanın kanıtları temelinde, AEİ alan EK'nin gebelik esnasında geç gebelikle ilişkili kanama komplikasyonu riski ciddi derecede artmamıştır. Ancak, bu çalışmaların istatistiksel kesinliği olmaması nedeniyle, orta derecede artmış bir risk yok demek mümkün değildir.

**Spontan düşük.** Bir Sınıf III çalışma<sup>14</sup> kontrol kadınlara kıyasla AEİ alan EK'de spontan düşük riskinin daha düşük olduğunu göstermiştir (%6.9 vs %7.5). Kontrol grupta OR hesaplaması için bir payda sunulmamıştır.

**Sonuç.** EK'de yüksek spontan düşük riskini destekleyecek veya reddedecek yeterli kanıt yoktur.

**EK'de gebelik esnasında epilepsi ile ilgili komplikasyon riskinden artış olur mu?** Yirmi beş makale EK'de gebelikte epilepsiyle ilgili komplikasyonlar için dahil etme ölçütlerini karşıladı.

**Nöbet frekansında değişim.** Gebe EK ile gebe olmayan EK'de nöbet frekansındaki değişimi kıyaslayan hiçbir çalışma yoktur; dolayısı ile doğru bir altın standart karşılaştırma grubu yoktur. Bu nedenle, tüm çalışmalar Sınıf IV olarak nitelendirilmiştir (tablo e-2). Üç makalede<sup>15-17</sup> her bir hastanın (gebelik başına) gebelik dışı nöbet frekansı kendi kontrolü olarak kabul edilmiştir. Yüz elli dört gebeliğin değerlendirildiği bir çalışmada,<sup>15</sup> nöbet frekansı gebelik öncesi nöbet frekansına göre %54 vakada değişmemiş (%95 CI 0.46–0.62) (48 nöbetsiz hasta dahil [%31]), %14 vakada azalmış (%95 CI 0.10–0.21) ve %32 vakada artmıştır (%95 CI 0.25–0.40). Bu çalışmada, nöbet frekansı arttığında AEİ dozu da yükseltilmiştir.

Yetmiş sekiz gebeliğin değerlendirildiği diğer bir çalışmada,<sup>16</sup> majör nöbetler için nöbet frekansı gebelik öncesi nöbet frekansına göre %72 vakada değişmemiş (%95 CI 0.61–0.81) (Wilcoxon testi  $p > 0.50$  önemli farklılıklar için), %14 vakada azalmış (%95 CI 0.08–0.24) ve %14 vakada artmıştır (%95 CI 0.08–0.24). Bu çalışmada, nöbet frekansı arttığında AEİ dozu da yükseltilmiştir.

Doksan üç gebeliğin değerlendirildiği üçüncü bir Sınıf IV çalışmada,<sup>17</sup> gebelik nöbet frekansının başlangıca göre farklı olmadığı anla-

şılmıştır ( $p = 0.42$ ). Kesin sayılar verilmemiştir, ancak bildirilen yüzde değişim şöyledir: %61 değişmemiş, %24 azalmış, %15 artmış. Nöbet artışının idiyopatik epilepsiden (%7) ziyade parsiyel epilepside (%29) olması beklenir. Bu çalışmada AEİ dozları değiştirilmemiştir.

Diğer bir Sınıf IV çalışmada<sup>18</sup> karşılaştırma olarak hem geriye dönük hatırlama hem de postpartum ileriye dönük nöbet frekansı kullanılmıştır. Bu 74 AEİ uyumlu hasta ile yapılan çalışmada, nöbet frekansı %80 vakada değişmemiş (%95 CI 0.69–0.87), %4 vakada azalmış (%95 CI 0.01–0.11) ve %16 vakada artmıştır (%95 CI 0.01–0.16). Bu çalışmada AEİ dozu değiştirilmemiştir.

Diğer bir makalede<sup>19</sup> postpartum nöbet frekansı karşılaştırma amacı ile kullanılmıştır. Yüz otuz sekiz gebeli bu çalışmada, nöbet frekansı %80 vakada değişmemiş (%95 CI 0.72–0.86), %3 vakada azalmış (%95 CI 0.01–0.07) ve %17 vakada artmıştır (%95 CI 0.12–0.25). Bu çalışmada AEİ dozu değiştirilmemiştir.

Bu çalışmalarda nöbet frekansı değişmeyen hastaların yüzdesi %54 ile 80 arasında değişir. En yüksek değişmeyen nöbet frekansı oranı, serum düzeyleriyle belgelenen %80 ile AEİ uyumlu hastalardadır.<sup>18</sup> Nöbet azalma oranı %3 ile %24 arasında ve nöbet artış oranı da %14 ile %32 arasında değişir.

Ne yazık ki, bu çalışmaların hiçbirine EK'de nöbet frekansının doğal stabilitesi hakkında bilgi sağlayabilecek doğru bir gebe olmayan EK mukayese grubu dahil edilmemiştir. Bu bilgi olmadan, nöbet frekansında gözlenen değişim doğrudan gebeliğe de atfedilebilir.

**Sonuç.** Gebe EK'de nöbet frekansındaki değişimi belirleyecek yeterli kanıt yoktur.

**Status epileptikus.** Gebe EK ile gebe olmayan EK'de status epileptikus riskini kıyaslayan hiçbir çalışma yoktur. Dolayısı ile tüm çalışmalar Sınıf IV olarak derecelendirilmiştir (tablo e-3). İki toplum temelli çalışmada gebelik esnasında EK'de status epileptikus frekansının %0–1.3 (0/154, %0, %95 CI 0.00–0.3<sup>15</sup>; 1/78 konvülsif status epileptikus, %1.3, %95 CI 0.00–0.07<sup>16</sup> ve 0/89, %0, %95 CI 0.00–0.04<sup>17</sup>) olduğu bildirilmiştir. Benzer şekilde, yaklaşık 2000 gebenin dahil edildiği büyük bir ileri dönük, ancak toplum temelli olmayan çalışmada<sup>20</sup> 1956 gebenin 36'sında status epileptikus (%1.8, %95 CI 0.01–0.03) saptanmıştır. Bu 36 status epileptikus atağından 12'si konvülsif ve 24'ü nonkonvülsiftir.

Bir öykü karşılaştırması olarak kullanılabilir benzer bir epilepsi popülasyonundan edinilmiş bilgi olmasa da, bu tahminler farklı epilep-

si tiplerine sahip geniş bir hasta serisinden elde edilen %1.6'lık yıllık status epileptikus frekansına yakın bir değerdir.<sup>21</sup> Bu karşılaştırma bize status epileptikusun gebelik esnasında daha sık gelişmediğini düşündürmektedir. Ancak, bu çalışmalarda gebe olmayan EK karşılaştırma grubunun olmaması gebelik esnasında göreceli status epileptikus riskini belirleme şansı vermemektedir.

**Sonuç.** EK'de yüksek status epileptikus riskini destekleyecek veya reddedecek yeterli kanıt yoktur.

**Daha önce nöbetsiz olan EK'de nöbet nüksü.** İki Sınıf II makale<sup>16,17</sup> gebelikten önceki 9 ay içinde nöbet geçirmeyen EK'li kişilerde %84–92'sinin gebelik esnasında da nöbet geçirmediğini düşündürmektedir (tablo e-4). Bir çalışmada<sup>16</sup> 45 gebe EK'den 38'i (%84; CI 0.71–0.92) ve diğer bir çalışmada da<sup>17</sup> 51 gebe EK'den 47'si (%92; CI 0.82–0.97) nöbetsiz kalmıştır.

Daha büyük bir Sınıf III makale<sup>22</sup> gebelikten önceki 1 yıl içinde nöbet geçirmeyen EK'den %80'inin gebelik esnasında nöbetsiz kaldığını düşündürmektedir (kesin sayı verilmemiştir). Bir Sınıf III makale ise gebelikten önceki 10 ay içinde nöbet geçirmeyen EK'den %74'ünün (%95 CI 0.62–0.82) gebelik esnasında nöbetsiz kaldığını düşündürmektedir.<sup>18</sup> Bir Sınıf III makale<sup>16,17</sup> de gebelikten önceki 9 ay içinde nöbet geçirmeyen 54 EK'den %94'ünün (%95 CI 0.85–0.98) ve gebelikten önceki 1 yıl içinde nöbet geçirmeyen 48 EK'den %92'sinin (%95 CI 0.80–0.98) gebelik esnasında nöbetsiz kaldığını göstermiştir.<sup>19</sup> Bu sonuçlar kanıt sınıfı ve çalışmaların örnek boyutu açısından tümüyle istikrarlıdır.

**Sonuç.** İki Sınıf II makale, EK'nin gebelikten önceki en az 9 ay ila 1 yıl boyunca nöbetsiz kalması halinde gebelik esnasında nöbetsiz kalma oranının %84–92 olduğunu göstermiştir.

**ÖNERİLER** Gebe ve gebelik planlayan EK ile görüşmede şunlar söylenmelidir:

- AEİ alan EK'de, sezaryen doğum riskinde muhtemelen ciddi bir (beklenenden 2 kattan fazla yüksek) risk artışı yoktur (Düzyey B). Ancak, AEİ alan EK'de orta derecede artmış bir sezaryen doğum riski (beklenenden 1.5 kattan fazla yüksek) vardır (Düzyey C).
- AEİ alan EK'de, geç gebelik kanaması riskinde muhtemelen ciddi bir (beklenenden 2 kattan fazla yüksek) artış yoktur (Düzyey B).
- AEİ alan EK'de, gebelik esnasında erken kontraksiyon veya erken travay ve doğum

riskinin orta derecede artmış (beklenenden 1.5 kattan fazla yüksek) olması beklenmez (Düzyey B).

- Sigara için EK'de gebelik esnasında erken kontraksiyon veya erken travay ve doğum riski ciddi derecede artıyor olabilir (Düzyey C).
- EK'nin gebelikten önceki en az 9 ay boyunca nöbetsiz kalması halinde gebelik esnasında nöbetsiz kalma olasılığı yüksektir (%84–92) (Düzyey B).
- Artmış preeklampsi, gebelik ile ilişkili hipertansiyon, spontan düşük, nöbet frekansında değişim veya status epileptikus riskinde artışı destekleyecek veya reddedecek yeterli kanıt yoktur (Düzyey U).

**KLİNİK BAĞLAM** Bu uygulama parametrelerinin en önemli bulgularından bazıları göstermediği şeylerdir. Gebelik esnasında EK'de beklenen obstetrik komplikasyon riskinde artış olduğunu düşündürecek aslında kesin kanıtlar yoktur. Bu, bize obstetrik komplikasyon hızının EK'de genel popülasyondan farklı olmadığını düşündürmektedir.

Dahası, bulgular gebelik esnasında nöbet veya status epileptikus oranında bir artış veya nöbetsiz EK'de gebelik esnasında nöbet relapsı riskinde bir artış da düşündürmemektedir. Nöbetsiz EK'nin gebelik esnasında nasıl davrandığı verileri, EK'nin muhtemelen nöbetsiz kalacağını gösterir ki gebelik planlayan hastalarının nöbet geçirmesini engellemeye çalışan doktorları rahatlatıcı bir bilgidir.

Bu bilginin, gebe kalan EK'de gerçek sağlık komplikasyon riskinin yüksekliğine (veya düşüklüğü) yönelik yeni bir bakış açısı sağlayabileceği ve hem hasta hem de doktorun anksiyetesini ve bu klinik duruma bağlı gelişen damgalamayı azaltmaya hizmet edeceği düşünülmektedir.

**GELECEK ARAŞTIRMALAR İÇİN ÖNERİLER**

EK'de preeklampsi, gebeliğe bağlı hipertansiyon ve spontan düşük riskinin artıp artmadığını saptamak için daha güçlü kanıtlara ihtiyaç vardır. Bu riskler eşli kontrol gruplarının kullanıldığı geniş, ileriye dönük çalışmalarda değerlendirilmelidir. Spesifik AEİ'nin obstetrik sonuçlar üzerindeki etkileri de henüz araştırılmamıştır ve daha fazla çalışmaya konu olmalıdır. AEİ kullanan gebelerin sonuçlarını değerlendirme amaçlı veri tabanları bu tür bilgi için potansiyel bir kaynak olabilir. Gebelik esnasında nöbet artışı risklerinin, ileriye dönük bazal bilgi kullanılarak değerlendirilmesi gerekir. Bu ana-

liz tipi gebelik esnasında nöbet artış nedenleri hakkında daha fazla bilgi sunacaktır. Bu nedenler AEİ uyumsuzluğu, gebelik metabolizması nedeniyle düzeylerin düşmesi veya uykusuz gecelere göre daha komplike olabilir. Örneğin, gebelik esnasında hormonal değişimlerin nöbet frekansı üzerindeki etkisi dikkatli bir ileriye dönük çalışmada değerlendirilebilir.

## YAZARLARIN BAĞLI BULUNDUĞU KURULUŞLAR

University of Miami (C.L.H.), Miami, FL; Emory University (P.B.P., K.J.M.), Atlanta, GA; New York Medical College (B.S.K.), New York; University of Tennessee Health Science Center (C.A.H.), Memphis; University of Wisconsin-Madison School of Pharmacy (B.G.); University of Maryland (J.H., T.Y.T., A.K.), Baltimore; Columbia University (W.A.H.), New York, NY; Centers for Disease Control and Prevention (D.T.), Atlanta, GA; Johns Hopkins University (P.W.K.), Baltimore, MD; Harvard Medical School (J.N.R., L.H.), Boston, MA; New York University School of Medicine (J.A.F.), New York; University of Calgary (S.W.), Alberta, Kanada; özel araştırmalar (A.N.W.), Newport, RI; New York University (B.V.), New York; Texas A&M University Health Science Center (R.F.), Houston; Beth Israel Deaconess Medical Center (P.O.S.), Boston, MA ve University of Pennsylvania (C.L.), Philadelphia.

## TEŞEKKÜR

Yazarlar Laura Moses'e bu yazının hazırlanmasındaki yardımları için teşekkür ederler.

## BEYAN

Yazarlar şu çıkar çatışmalarını bildirmiştir: Dr. Harden Cyberonics, GlaxoSmithKline, UCB Pharma, Valeant ve SK Pharmaceuticals'in bilimsel tavsiye kurullarında ve GlaxoSmithKline, Pfizer, UCB Pharma ve Abbott'un konuşmacı bürolarında çalışmaktadır. Epilepsy Currents'in editörlüğünü yapmaktadır ve Elsevier'den telif ücreti almaktadır. Dr. Harden Forest, UCB Pharma, Ortho McNeil ve NIH/NINDS'den araştırma fonu almaktadır. Dr. Harden polikliniğinde epilepsili kadınları muayene etmektedir. Dr. Hopp UpToDate.com elektronik tıp dergisinden telif ücreti almaktadır. UCB Pharma ve GlaxoSmithKline'nin konuşmacı bürolarının üyesidir. Dr. Hopp bir medikolegal vakada danışmanlık yapmıştır. Dr. Ting UCB Pharma'nın bilimsel tavsiye kurulunda çalışmakta ve Epilepsy Foundation of America'dan honoraria almaktadır. Dr. Pennell UCB Pharma'nın sponsorluğunda Keppra Pregnancy Registry için Uzman Paneli'nde çalışmaktadır. Northeast Regional Epilepsy Group'dan 2008 Epilepsy Symposium'da konuşması için seyahat ücreti, UK Research Council'den Epilepsy Research UK International Expert Workshop'da konuşması, UCB Pharma'dan Executive Panel meeting for Pregnancy Registry'e katılması, American Epilepsy Society'den Board of Directors' Meeting'e katılması, Epilepsy Foundation'dan Board of Directors' and orientation meetings'e katılması, Long Island Jewish Hospital'den Neurology Grand Rounds'da ders vermesi, Duke University'den Neurology Grand Rounds'da ders vermesi, Brigham and Women's Hospital'den Epilepsy Research Conference'de ders vermesi, Milken foundation'dan Pregnancy Registry toplantısına katılması ve Massachusetts General Hospital'den Annual Teratogens Course'de konuşması için ücret almıştır. Massachusetts Medical Society'den Journal Watch Neurology için bir katkı makalesi karşılığı, NEJM için derleme karşılığı ve Lancet Neurology için, Northeast Regional Epilepsy group'dan 2008 Epilepsy Symposium'da konuşması için, North Shore Long Island Jewish Health system, Duke University, University of Maryland, Massachusetts General Hospital'dan postgraduate course in Human Teratogens'de konuşması ve AAN'den konuşması ve yıllık kursları yönetmesi için honoraria almaktadır. Dr. Pennell Epilepsy Currents için bir yardımcı editör olarak ve editorial board of Epilepsia'da çalışmaktadır. Dr. Pennell UCB Pharma, Marinus Pharmaceuticals, NIH, NINDS, NIMH, CDC ve Emory University Research Council'den has araştırma desteği almaktadır. Dr. French UCB Pharma, Johnson and Johnson, Eisai, Novartis, Valeant, Icagen, Intranasal, Sepracor ve Ma-

rinus'un bilimsel tavsiye kurulunda çalışmaktadır. Bulgularını sunmak veya ders vermek için UCB Pharma, Kyowa, Eisai, Johnson and Johnson, Valeant ve GlaxoSmithKline'den seyahat ücreti almaktadır. Epilepsy Currents'de yardımcı editör ve Epileptic Disorders'de supplement editörü olarak çalışmaktadır. Dr. French, çok sayıda ilaç şirketinden maddi destek alan (GlaxoSmithKline, UCB Pharma, Johnson and Johnson, Cyberonics, Schwarz Pharma, Ortho McNeil, Eisai, Jazz Pharmaceuticals, Ovation Pharmaceuticals, Endo Pharmaceuticals, Bial Pharmaceuticals, Neurovista, Valeant Pharmaceuticals, Icagen, Supernus, Intranasal, SK Pharmaceuticals, Taro Pharmaceuticals, Neurotherapeutics, Sepracor ve Novartis) Epilepsy Study Consortium'un başkanıdır ve konsorsiyum adına konsültasyonlar yapmaktadır. Dr. French Johnson and Johnson, Eisai, UCB Pharma, SK Pharmaceuticals, Valeant, Pfizer, NIH ve Epilepsy Research Foundation'dan araştırma fonu almaktadır. Dr. Hauser Ovation ve Valeant'in bilimsel tavsiye kurulunda çalışmaktadır. Acta Neurologica Scandinavica, Neuroepidemiology ve Epilepsy Research'in editöryal kurulunda çalışmaktadır. Cornell University Symposium on epilepsy'den honoraria almış ve Pfizer için konsültanlık yapmaktadır. Dr. Hauser AAMC/CDC, NIH/NINDS, FAA, Mayo Clinic ve Hotchkiss Neurological Institute'den araştırma desteği almaktadır ve bir FAA konsültanı olarak uzman danışmanlık vermiştir. Dr. Wiebe Neurology, Epilepsia, Epilepsy & Behavior ve Canadian Journal of Neurological Sciences'in editöryal kurulunda çalışmaktadır. Dr. Thurman CDC'nin bir çalışanıdır. Dr. Meador Neurology, Journal of Clinical Neurophysiology, Cognitive and Behavioral Neurology, Epilepsy & Behavior, Epilepsy Currents ve Epilepsy.com'da dergi editörü olarak çalışır. NIH/NINDS, GlaxoSmithKline, Eisai, Marius, Myriad, Neuropace, SAM Technology ve UCB Pharma'dan araştırma fonu almıştır. Dr. Meador klinik çalışmalarının %30-40'ını EEG ve epilepsili hastaların bakımının oluşturduğunu tahmin etmektedir. Dr. Koppel'in herhangi bir beyanı yoktur. Dr. Kaplan UCB Pharma, GSK ve Ortho McNeil'in konuşmacı bürolarında çalışmaktadır. Neurophysiologie Clinique, Journal of Clinical Neurophysiology ve Epilepsia'da yardımcı editör olarak çalışmaktadır. Demos Publications'dan Neurological Disease in Women, Epilepsy A to Z, Imitators of Epilepsy ve Nonconvulsive Status Epilepticus kitapları için telif ücreti almıştır. Medical College of South Carolina, Duke University ve Medical College of Virginia'dan konuşmacı honoraria, NIH, Schwarz, Ortho McNeil ve Pfizer'den araştırma almaktadır ve Schering-Plough ve Infinite Biological Technologies'in bir konsültanıdır. Dr. Robinson'un herhangi bir beyanı yoktur. Dr. Gidal GlaxoSmithKline, UCB Pharma ve Abbott Labs bilimsel tavsiye kurullarında ve Epilepsy & Behavior, Annals of Pharmacotherapy ve Pharmacist's Letter'de editör olarak çalışmaktadır. Dr. Gidal UCB Pharma'dan araştırma desteği almaktadır. Dr. Gidal UCB'den araştırma bursu almıştır. Dr. Hovinga klinik zamanının %10'dan azını farmakoloji konsültasyonlarına ayırdığı tahmin etmektedir. Dr. Wilner GlaxoSmithKline'nin bilimsel tavsiye kurulunda çalışmakta ve seyahat ücreti almaktadır. Demos Publications'dan Epilepsy: 199 Answers ve Epilepsy in Clinical Practice için telif ücreti almıştır. GlaxoSmithKline'den direktör kurul tazminatı almaktadır. Dr. Vazquez Eisai, UCB, GSK ve Ortho McNeil bilimsel tavsiye kurullarında çalışmaktadır. UCB, GSK, Ortho McNeil ve Eisai'den honoraria almaktadır. Dr. Vazquez Eisai, GSK, Ortho McNeil, UCB ve Novartis'in konuşmacı bürolarında çalışmaktadır. Dr. Holmes Abbott Labs, Eisai, Novartis, Ortho McNeil ve Pfizer'den araştırma desteği almaktadır. Dr. Krumholz Commercial Drivers and Epilepsy Department of Transportation Uzman Panelinde ve The Neurologist ve Clinical EEG and Neuroscience editöryal kurulunda çalışmaktadır. Robert Wood Johnson Medical School'dan grand rounds için honoraria almaktadır Dr. Finnell NEAD study at Emory University, University of Houston Center for Life Sciences Technology, NIH ve NIEHS National Advisory Environmental Health Sciences Council bilimsel tavsiye kurullarında çalışmaktadır. Fundacion BBVA, NIEHS National Advisory Environmental Health Sciences Council, IKMC Steering Committee, European Epilepsy Meeting, NIH ve AES'den seyahat ücreti almaktadır. Dr. Finnell Birth Defects Research Part A için dergi editörü olarak çalışmaktadır ve folat reseptör otoantikör assayın patentini almıştır. McGill University-Montreal Neurological Institute'den honoraria almaktadır ve Centers for Disease Control and Prevention for National Birth Defects Prevention Study ve Methodist Hospital Research Institute'den araştırma fonu almaktadır. Dr. Finnell uzman danışmanlık yapmış, affadavitler hazırlamış ve bu taslağın başlığı ile ilgili kanuni takibat açısından tamlık yapmıştır. Bn Le Guen'in herhangi bir beyanı yoktur.

## AÇIKLAMA

Bu derleme American Academy of Neurology'nin bir eğitim hizmetidir. Güncel bilimsel ve klinik bilginin gözden geçirilmesine dayalıdır. Belli bir nörolojik problemin tüm olası doğru bakım yöntemlerinin ve belli bir işlemi seçmek için tüm geçerli ölçütlerin sunulması amaçlanmamıştır. Aynı zamanda mantıklı alternatif metodolojilerin dışlanması da istenmemiştir. AAN, belli hasta bakım kararlarının tüm koşullarda hastaya ve onunla ilgilenen doktora kaldığını kabul eder. Kanıta dayalı kılavuz(lar)u güncel uygulama alışkanlıkları ve zorluklarla birlikte bir perspektife sokmak için klinik bağlam kısmı oluşturulmuştur. Hiçbir resmi uygulama tavsiyesinde bulunulmamıştır. Rapordaki bulgu ve yorumlar yazarlara aittir ve Centers for Disease Control and Prevention'ın resmi duruşunu temsil etmez.

*19 Aralık 2008'de alındı. Son baliyle 23 Mart 2009'da yayına kabul edildi.*

## KAYNAKLAR

1. United States Department of Health and Human Services, Centers for Disease Control and Prevention, National Center for Health Statistics, Bridged-Race Population Estimates, United States. July 1st resident population by state, county, age, sex, bridged-race, and Hispanic origin on CDC WONDER On-line Database. Available at: <http://wonder.cdc.gov>. Accessed June 2008.
2. Hirtz D, Thurman DJ, Gwinn-Hardy K, et al. How common are the "common" neurologic disorders? *Neurology* 2007;68:326–337.
3. Yerby MS. Quality of life, epilepsy advances, and the evolving role of anticonvulsants in women with epilepsy. *Neurology* 2000;55:S21–S31.
4. Report of the Quality Standards Subcommittee of the American Academy of Neurology. Practice Parameter: Management issues for women with epilepsy (summary statement). *Neurology* 1998;51:944–948.
5. Viinikainen K, Heinonen S, Eriksson K, Kalviainen R. Community-based, prospective, controlled study of obstetric and neonatal outcomes of 179 pregnancies in women with epilepsy. *Epilepsia* 2006;47:186–192.
6. Yusuf S, Peto R, Lewis J, Collins R, Sleight P. Beta blockade during and after myocardial infarction: an overview of the randomized trials. *Prog Cardiovasc Dis* 1985;27:335–371.
7. Richmond JR, Krishnamoorthy P, Andermann E, Benjamin A. Epilepsy and pregnancy: an obstetric perspective. *Am J Obstet Gynecol* 2004;190:371–379.
8. Laskowska M, Leszczyrska-Gorzela B, Oleszczuk J. Pregnancy in women with epilepsy. *Gynecol Obstet Invest* 2001;51:99–102.
9. Olafsson E, Hallgrimsson JT, Hauser WA, Ludvigsson P, Gudmundsson G. Pregnancies of women with epilepsy: a population-based study in Iceland. *Epilepsia* 1998;39:887–892.
10. Sawhney H, Vasishtha K, Suri V, Khunnu B, Goel P, Sawhney IMS. Pregnancy with epilepsy: a retrospective analysis. *Int J Gynecol Obstet* 1996;54:17–22.
11. Hiilesmaa VK, Bardy A, Teramo K. Obstetric outcome in women with epilepsy. *Am J Obstet Gynecol* 1985;152:499–504.
12. Hvas CL, Henriksen TB, Ostergaard JR, Dam M. Epilepsy and pregnancy: effect of antiepileptic drugs and lifestyle on birth weight. *Br J Obstet Gynaecol* 2000;107:896–902.
13. Wilhelm J, Morris D, Hotham N. Epilepsy and pregnancy: a review of 98 pregnancies. *Aust NZ J Obstet Gynaecol* 1990;30:290–295.
14. Martin PJ, Millac PAH. Pregnancy, epilepsy, management and outcome: a 10-year perspective. *Seizure* 1993;2:277–280.
15. Bardy AH. Incidence of seizures during pregnancy, labor and puerperium in epileptic women: a prospective study. *Acta Neurol Scand* 1987;75:356–360.
16. Gjerde IO, Strandjord RE, Ulstein M. The course of epilepsy during pregnancy: a study of 78 cases. *Acta Neurol Scand* 1988;78:198–205.
17. Tomson T, Lindbom U, Ekqvist B, Sundqvist A. Epilepsy and pregnancy: a prospective study of seizure control in relation to free and total plasma concentrations of carbamazepine and phenytoin. *Epilepsia* 1994;35:122–130.
18. Otani K. Risk factors for the increased seizure frequency during pregnancy and puerperium. *Folia Psychiatr Neurol Jpn* 1985;39:33–41.
19. Tanganelli P, Regesta G. Epilepsy, pregnancy, and major birth anomalies: an Italian prospective, controlled study. *Neurology* 1992;42(4 suppl 5):89–93.
20. EURAP Study Group. Seizure control and treatment in pregnancy. *Neurology* 2006;66:354–360.
21. Janz D. Die Epilepsien. Spezielle pathologie und therapie. Stuttgart: Georg Thieme Verlag; 1969.
22. Vajda FJE, Hitchcock A, Graham J, O'Brien T, Lander C, Eadie M. Seizure control in antiepileptic drug-treated pregnancy. *Epilepsia* 2008;49:172–175.
